# Supplementary material for: Generation of Cobalt-Containing Nanoparticles on Carbon via Pyrolysis of a Cobalt Corrole and Its Application in the Hydrogenation of Nitroarenes
Source: MDPI journal article supplement (doi:10.3390/catal12010011), 2021-12-23
Supplement: s1 [file s1]

Archive with 1 entries (1 files):
- catalysts-1500903-supplementary.pdf
